# Supplementary material for: Genetic Alterations and Transcriptional Expression of m6A RNA Methylation Regulators Drive a Malignant Phenotype and Have Clinical Prognostic Impact in Hepatocellular Carcinoma
Source: Front Oncol. 2020 Jul 21;10:900. doi: 10.3389/fonc.2020.00900 (PMC7396691; doi:10.3389/fonc.2020.00900)
Supplement: Table S9 — Pathway analysis for cluster1 in HCC. [file Table_9.XLSX]

## Sheet: gsea_report_for_cluster1_155928
Table S9. Pathway analysis for cluster1 in HCC
NAME	SIZE	ES	NES	NOM p-val	FDR q-val	FWER p-val	RANK AT MAX	LEADING EDGE
KEGG_OOCYTE_MEIOSIS	108	-0.562966	-2.05278	0	0.0586126	0.028	4683	tags=48%, list=19%, signal=59%
KEGG_UBIQUITIN_MEDIATED_PROTEOLYSIS	128	-0.623807	-2.04082	0	0.0310927	0.03	5909	tags=66%, list=24%, signal=87%
KEGG_CELL_CYCLE	120	-0.643867	-2.03594	0	0.0207285	0.03	5440	tags=68%, list=22%, signal=87%
KEGG_SPLICEOSOME	118	-0.693283	-2.01325	0	0.0211339	0.036	3598	tags=68%, list=14%, signal=79%
KEGG_RNA_DEGRADATION	54	-0.634397	-1.94471	0	0.0391864	0.068	8514	tags=89%, list=34%, signal=135%
KEGG_BASE_EXCISION_REPAIR	33	-0.659018	-1.9089	0.00190476	0.052373	0.104	6275	tags=73%, list=25%, signal=97%
KEGG_HOMOLOGOUS_RECOMBINATION	26	-0.714047	-1.88921	0.0019305	0.0520728	0.123	5670	tags=85%, list=23%, signal=109%
KEGG_MISMATCH_REPAIR	23	-0.749069	-1.87236	0	0.0532953	0.14	3503	tags=74%, list=14%, signal=86%
KEGG_NUCLEOTIDE_EXCISION_REPAIR	44	-0.613388	-1.83139	0.00191571	0.0728434	0.208	5024	tags=64%, list=20%, signal=80%
KEGG_PROGESTERONE_MEDIATED_OOCYTE_MATURATION	84	-0.50935	-1.82242	0	0.0719897	0.221	7244	tags=54%, list=29%, signal=75%
KEGG_GLYCOSYLPHOSPHATIDYLINOSITOL_GPI_ANCHOR_BIOSYNTHESIS	25	-0.616867	-1.81796	0.00552486	0.0680497	0.229	8188	tags=80%, list=33%, signal=119%
KEGG_NEUROTROPHIN_SIGNALING_PATHWAY	122	-0.528327	-1.81476	0	0.0647379	0.239	6227	tags=52%, list=25%, signal=70%
KEGG_BASAL_TRANSCRIPTION_FACTORS	34	-0.611148	-1.80738	0	0.0646343	0.253	8446	tags=79%, list=34%, signal=120%
KEGG_NOTCH_SIGNALING_PATHWAY	43	-0.576683	-1.79793	0.00585938	0.0659033	0.273	5457	tags=53%, list=22%, signal=68%
KEGG_DNA_REPLICATION	36	-0.726838	-1.77613	0.00782779	0.0748362	0.312	5670	tags=86%, list=23%, signal=111%
KEGG_ENDOCYTOSIS	171	-0.480184	-1.73665	0.00208768	0.0960065	0.388	8951	tags=58%, list=36%, signal=90%
KEGG_PATHWAYS_IN_CANCER	309	-0.447042	-1.72377	0	0.0998596	0.412	7908	tags=47%, list=32%, signal=68%
KEGG_VASOPRESSIN_REGULATED_WATER_REABSORPTION	43	-0.55508	-1.71838	0.00619835	0.0973606	0.42	4781	tags=51%, list=19%, signal=63%
KEGG_PANCREATIC_CANCER	69	-0.547066	-1.7134	0.00816326	0.0962924	0.432	7890	tags=65%, list=32%, signal=95%
KEGG_MTOR_SIGNALING_PATHWAY	50	-0.508365	-1.69411	0.0181087	0.107481	0.476	9546	tags=70%, list=38%, signal=113%
