# Supplementary material for: Genetic Alterations and Transcriptional Expression of m6A RNA Methylation Regulators Drive a Malignant Phenotype and Have Clinical Prognostic Impact in Hepatocellular Carcinoma
Source: Front Oncol. 2020 Jul 21;10:900. doi: 10.3389/fonc.2020.00900 (PMC7396691; doi:10.3389/fonc.2020.00900)
Supplement: Table S10 — Pathway analysis for cluster2 in HCC. [file Table_10.XLSX]

## Sheet: gsea_report_for_cluster2_155928
Table S10. Pathway analysis for cluster2 in HCC.
NAME	SIZE	ES	NES	NOM p-val	FDR q-val	FWER p-val	RANK AT MAX	LEADING EDGE
KEGG_COMPLEMENT_AND_COAGULATION_CASCADES	69	0.784111	2.22827	0	0.000907407	0.001	1425	tags=61%, list=6%, signal=64%
KEGG_RETINOL_METABOLISM	48	0.758161	2.15242	0.00186916	0.00101935	0.003	1446	tags=56%, list=6%, signal=60%
KEGG_DRUG_METABOLISM_CYTOCHROME_P450	59	0.736018	2.15053	0	0.000679568	0.003	1446	tags=61%, list=6%, signal=65%
KEGG_PRIMARY_BILE_ACID_BIOSYNTHESIS	16	0.926537	2.09326	0	0.00178004	0.01	626	tags=75%, list=3%, signal=77%
KEGG_METABOLISM_OF_XENOBIOTICS_BY_CYTOCHROME_P450	56	0.67083	2.01974	0.00187266	0.00549719	0.026	1446	tags=48%, list=6%, signal=51%
KEGG_FATTY_ACID_METABOLISM	40	0.788828	1.98256	0.00406504	0.00657258	0.04	1894	tags=70%, list=8%, signal=76%
KEGG_TRYPTOPHAN_METABOLISM	37	0.683877	1.97842	0.0019685	0.00572963	0.04	1829	tags=59%, list=7%, signal=64%
KEGG_GLYCINE_SERINE_AND_THREONINE_METABOLISM	30	0.739068	1.95773	0.00207469	0.00630975	0.049	1096	tags=60%, list=4%, signal=63%
KEGG_VALINE_LEUCINE_AND_ISOLEUCINE_DEGRADATION	44	0.754503	1.93413	0.00401606	0.00744487	0.065	1549	tags=59%, list=6%, signal=63%
KEGG_PPAR_SIGNALING_PATHWAY	68	0.586501	1.87713	0	0.0123366	0.115	1718	tags=47%, list=7%, signal=50%
KEGG_STEROID_HORMONE_BIOSYNTHESIS	42	0.612041	1.84137	0.0150094	0.0175481	0.161	972	tags=36%, list=4%, signal=37%
KEGG_PROPANOATE_METABOLISM	32	0.666996	1.79293	0.0224033	0.0267719	0.251	1280	tags=56%, list=5%, signal=59%
KEGG_BUTANOATE_METABOLISM	34	0.636534	1.73881	0.0156556	0.0391825	0.352	1549	tags=53%, list=6%, signal=56%
KEGG_BETA_ALANINE_METABOLISM	22	0.646159	1.7117	0.0191205	0.0452675	0.41	1261	tags=55%, list=5%, signal=57%
KEGG_PEROXISOME	76	0.559044	1.6979	0.0356394	0.0475558	0.439	1027	tags=41%, list=4%, signal=42%
KEGG_ARGININE_AND_PROLINE_METABOLISM	50	0.519609	1.65286	0.0211132	0.0637714	0.557	2005	tags=54%, list=8%, signal=59%
KEGG_DRUG_METABOLISM_OTHER_ENZYMES	40	0.515929	1.6131	0.0378072	0.0813505	0.666	1678	tags=52%, list=7%, signal=56%
KEGG_TYROSINE_METABOLISM	38	0.499781	1.58413	0.0396226	0.0931176	0.734	1096	tags=39%, list=4%, signal=41%
KEGG_PHENYLALANINE_METABOLISM	17	0.581203	1.58217	0.0366089	0.0891897	0.737	1829	tags=53%, list=7%, signal=57%
KEGG_ASCORBATE_AND_ALDARATE_METABOLISM	16	0.661406	1.56009	0.0721443	0.0979409	0.781	1261	tags=44%, list=5%, signal=46%
